# Supplementary material
Source: PubMed Central journal article supplement (PMC2665190)

Type of file: table

Label: Table1

Filename: 3 CollagenSynthesisSupplementTabl1.gif

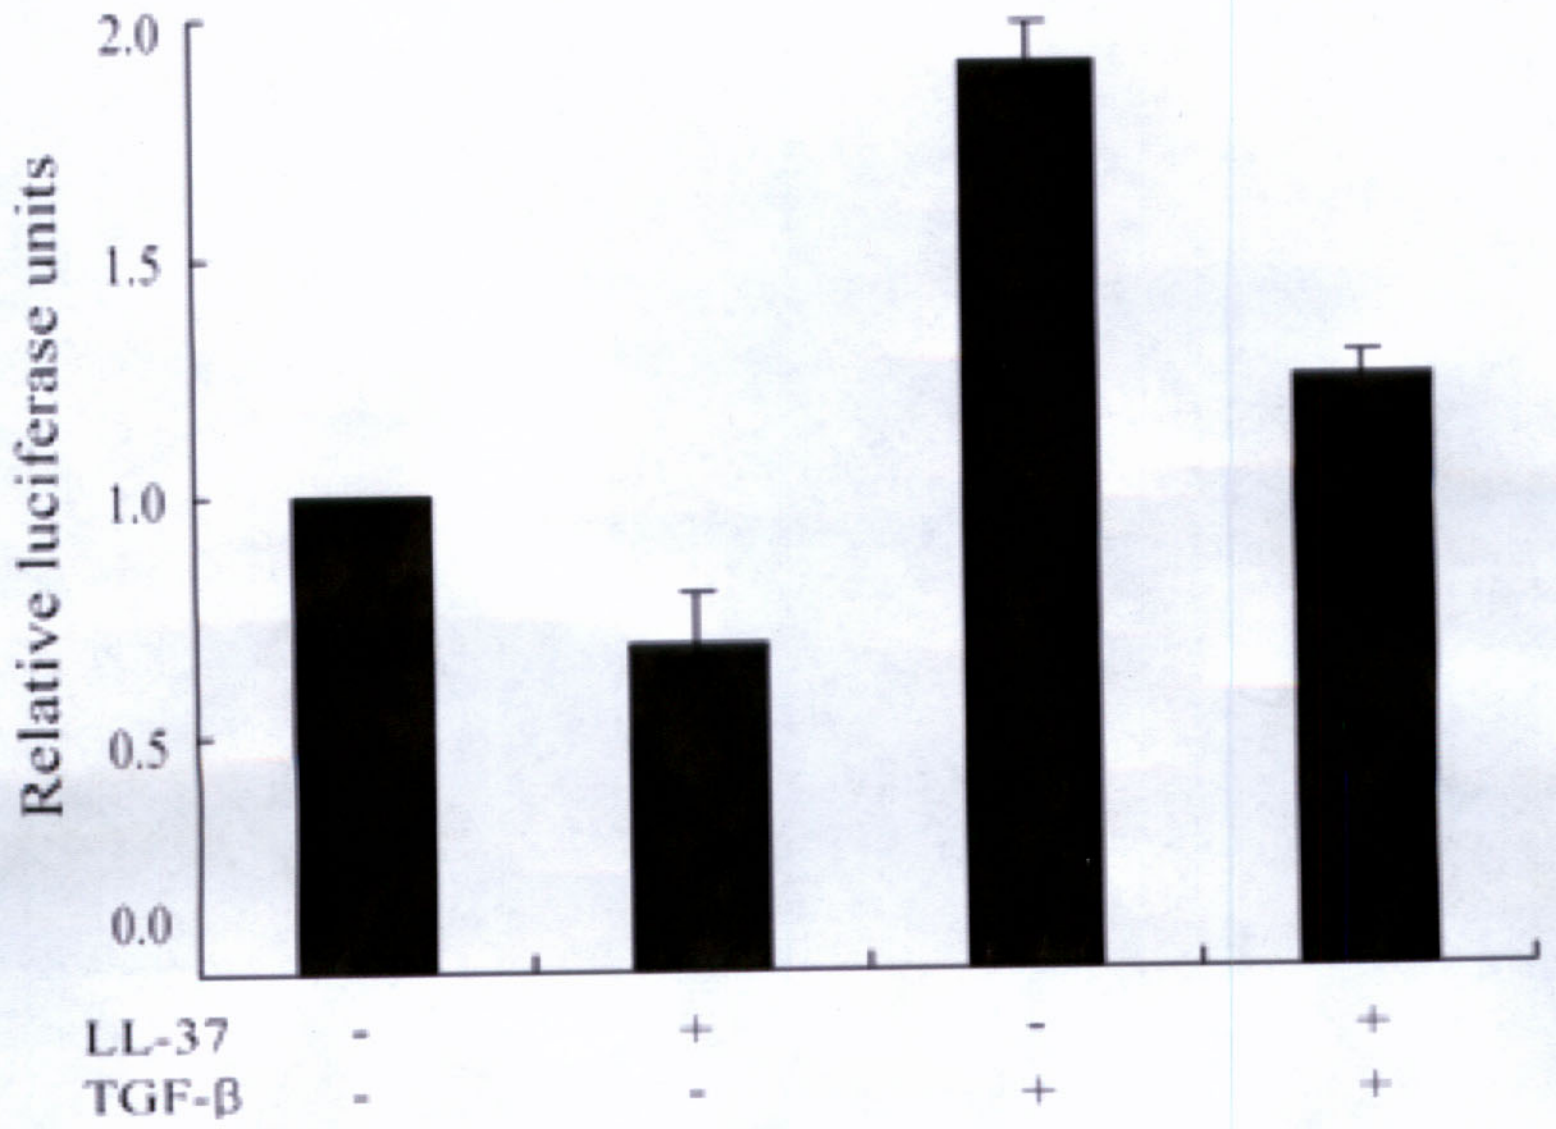

Supplement: NIHMS91855-supplement-01.pdf [file NIHMS91855-supplement-01.pdf]
